# Supplementary material
Source: Springer Nature journal article supplement (https://www.springermedizin.de/resource/supplementary/12943_2013_1521_MOESM9_ESM.pdf/9552440)

**A** PANC-1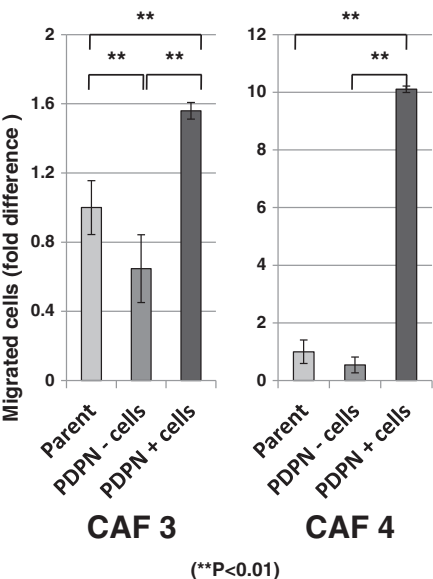

## SUIT-2

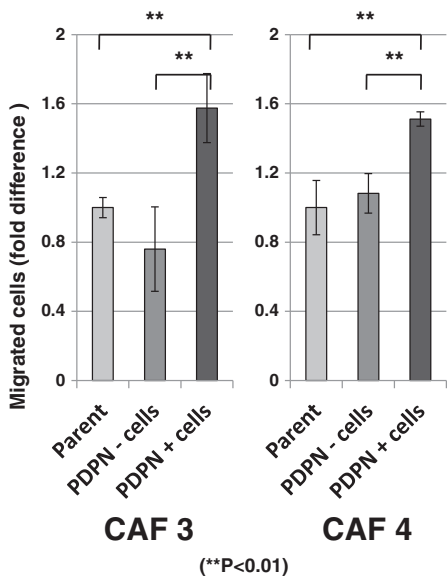**B** PANC-1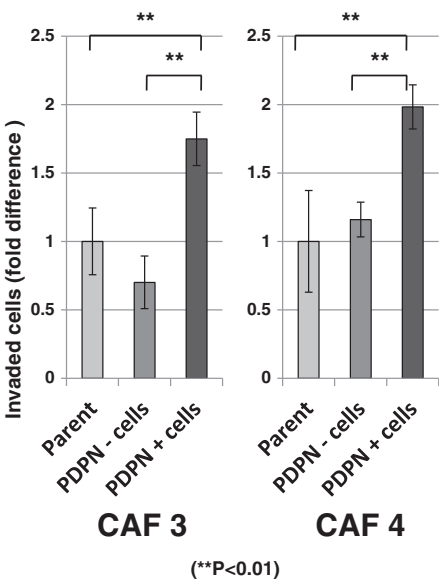

## SUIT-2

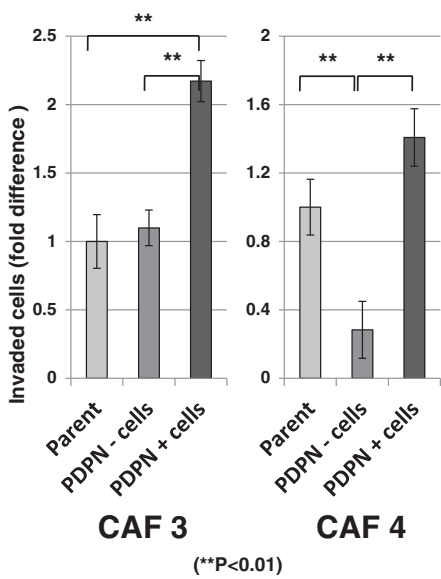

Supplement: MOESM9 [file 9552440]
